# Supplementary material for: Aminophosphine-based continuous liquid-phase synthesis of InP and InP/ZnS quantum dots in a customized tubular flow reactor
Source: Royal Society of Chemistry journal article supplement (doi:10.1039/d2re00378c), 2022-12-16
Supplement: d2re00378c1.pdf [file d2re00378c1.pdf]

## **Aminophosphine-based continuous liquid-phase synthesis of InP and InP/ZnS quantum dots in customized tubular flow reactor**

Zhuang Wang <sup>a</sup>, Doris Segets <sup>a, b \*</sup>

<sup>a</sup> Chair for Particle Science and Technology, Institute for Combustion and Gas Dynamics  
(IVG-PST), University of Duisburg-Essen (UDE), Duisburg, Germany

<sup>b</sup> Center for Nanointegration Duisburg-Essen (CENIDE), Duisburg, Germany

### **\*Corresponding Authors**

Prof. Doris Segets, E-mail address: [doris.segets@uni-due.de](mailto:doris.segets@uni-due.de)

### **Keywords:**

Quantum dots; Indium phosphide; Continuous flow synthesis; Aminophosphine

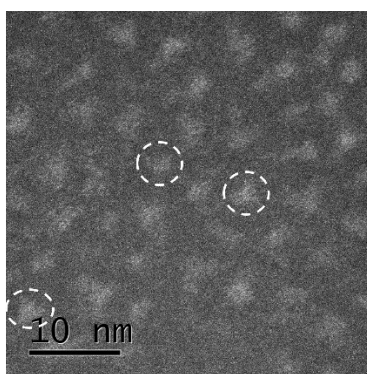

**Fig. S1:** TEM images of InP QDs synthesized at 180 °C and 0.1 mL/min.

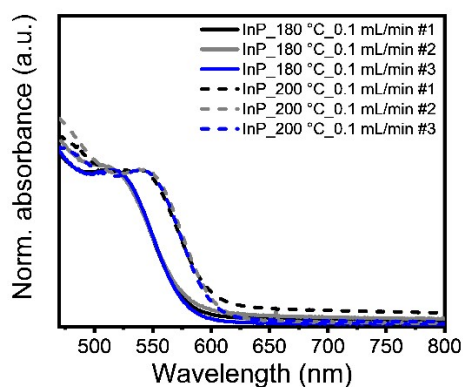

**Fig. S2:** UV-Vis spectra of InP QDs synthesized at 180 °C and 200 °C from different syntheses (#1 and #2 were synthesized using the same stock solution at different days; #2 and #3 were synthesized using different stock solution).

**Table S1:** Chemical yield and estimated production rate at different temperatures (Flow rate: 0.1 mL/min).

|                                  |      |      |      |
|----------------------------------|------|------|------|
| Temperature (°C)                 | 180  | 200  | 220  |
| Chemical yield (%)               | 30.8 | 73.6 | 70.0 |
| Estimated production rate (mg/h) | 45   | 107  | 101  |

**Table S2:** Chemical yield and estimated production rate at different flow rates (T: 200 °C).

|                                  |      |      |      |
|----------------------------------|------|------|------|
| Flow rate (mL/min)               | 0.3  | 0.1  | 0.05 |
| Chemical yield (%)               | 32.1 | 73.6 | 68.6 |
| Estimated Production rate (mg/h) | 47   | 107  | 100  |
